# Supplementary material for: Comparison of stimulus-evoked cerebral hemodynamics in the awake mouse and under a novel anesthetic regime
Source: PubMed Central journal article supplement (PMC4517464; doi:10.1038/srep12621), 2015-07-28
Supplement: srep12621-s1.pdf [file srep12621-s1.pdf]

## **Supplementary Information**

### **Comparison of stimulus-evoked cerebral hemodynamics in the awake mouse and under a novel anesthetic regime**

Paul S Sharp<sup>1,2\*</sup>, Kira Shaw<sup>1</sup>, Luke Boorman<sup>1</sup>, Samuel Harris<sup>1</sup>, Aneurin J Kennerley<sup>1</sup>, Mimoun Azzouz<sup>2</sup>, Jason Berwick<sup>1</sup>.

<sup>1</sup>Department of Psychology, University of Sheffield, Sheffield, UK

<sup>2</sup>Sheffield Institute for Translational Neuroscience, Department of Neuroscience, University of Sheffield, Sheffield, UK

\*Correspondence: Dr P S Sharp. E-mail: [p.sharp@sheffield.ac.uk](mailto:p.sharp@sheffield.ac.uk)

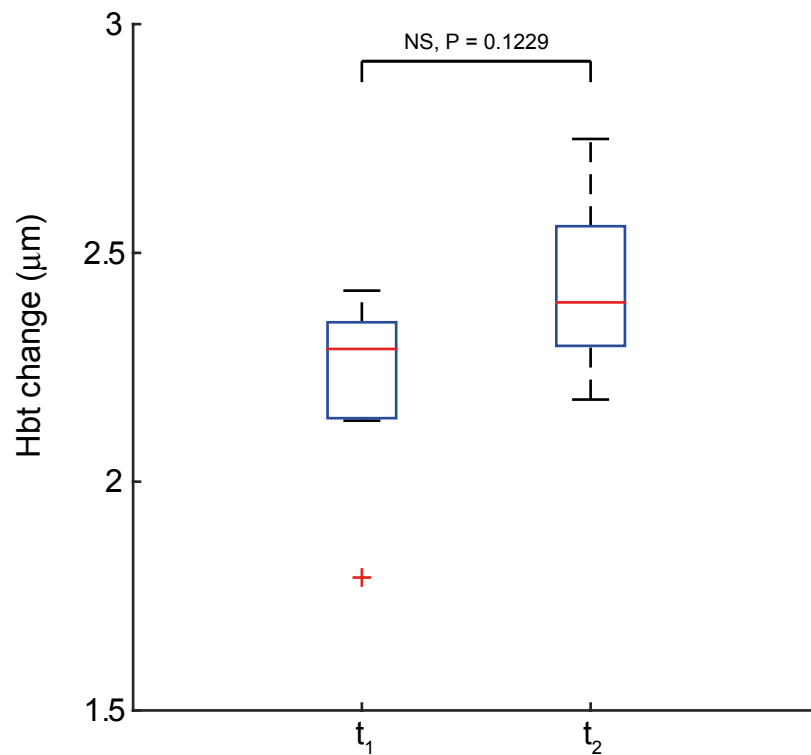

**Supplementary Figure 1.** Box plots comparing the average Hbt response (median and interquartile range) in the active region during a 16 s whisker stimulation (5 Hz) at  $t_1$  (0-35 min) and at  $t_2$  (150 - 185 min). All mice ( $n = 6$ ) were under fentanyl-fluanisone/midazolam and isoflurane anesthesia (100%  $\text{O}_2$ ). NS, non-significant difference between  $t_1$  and  $t_2$ ; 2-tailed paired  $t$ -test.

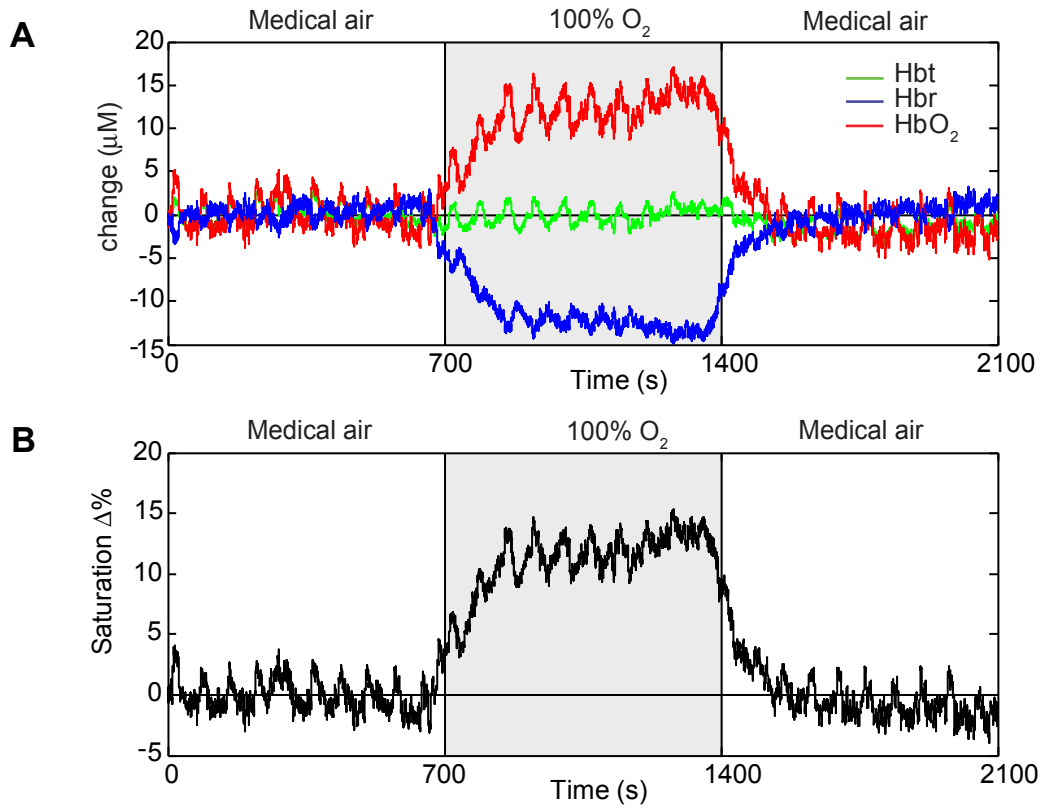

**Supplementary Figure 2.** The effect of medical air on baseline hemodynamics. **(A)** Averaged time series ( $n = 4$ ) for Hbt, HbO<sub>2</sub>, Hbr. **(B)** Percentage change in hemoglobin saturation caused by increasing the levels of oxygen from 21% (medical air) to 100%.

| <b>O<sub>2</sub> Saturation [%]</b> |                                    | <b>Heart rate [bpm]</b> |                                    | <b>Breathing rate [bpm]</b> |                                    |
|-------------------------------------|------------------------------------|-------------------------|------------------------------------|-----------------------------|------------------------------------|
| 100% O <sub>2</sub>                 | Medical air                        | 100% O <sub>2</sub>     | Medical air                        | 100% O <sub>2</sub>         | Medical air                        |
| <b>98.4</b><br>± 0.1                | <b>96.4<sup>***</sup></b><br>± 0.3 | <b>405.4</b><br>± 9.0   | <b>427.6<sup>*</sup></b><br>± 10.2 | <b>91.6</b><br>± 5.0        | <b>108.0<sup>**</sup></b><br>± 3.2 |

**Supplementary Table 1.** The effect of medical air on systemic physiological parameters. All data are mean ± SEM (n = 5). Significant differences, 2-tailed, paired *t*-test, \*P < 0.04, \*\*P < 0.02, \*\*\*P < 0.002.
